# Supplementary material
Source: HighWire-hosted journal article supplement (https://rmdopen.bmj.com/content/8/2/e002570)
Supplement: inline-supplementary-material-1 [file inline-supplementary-material-1.pdf]

**Supplementary file 1: Search strategy**

## Search strategy – Embase

1. \*rheumatoid arthritis/
2. "rheumatoid arthritis".ti,ab,kw.
3. 1 OR 2
4. infliximab.ti,ab,kw.
5. \*infliximab/
6. remicade.ti,ab,kw.
7. remsima.ti,ab,kw.
8. inflectra.ti,ab,kw.
9. humira.ti,ab,kw.
10. \*adalimumab/
11. adalimumab.ti,ab,kw.
12. cimzia.ti,ab,kw.
13. \*certolizumab pegol/
14. (certolizumab adj2 pegol).ti,ab,kw.
15. enbrel.ti,ab,kw.
16. \*etanercept/
17. etanercept.ti,ab,kw.
18. benepali.ti,ab,kw.
19. simponi.ti,ab,kw.
20. \*golimumab/
21. golimumab.ti,ab,kw.
22. bDMARD\$.ti,ab,kw.
23. biologic\$ DMARD\$.ti,ab,kw.
24. \*tumor necrosis factor antibody/
25. anti-tnf.ti,ab,kw.
26. anti-tumor necrosis factor.ti,ab,kw.
27. anti-tumour necrosis factor.ti,ab,kw.
28. Tnfi.ti,ab,kw.
29. tn timeraction.ti,ab,kw.
30. tn timeraction.ti,ab,kw.
31. Tn timeraction.ti,ab,kw.
32. or/4-31
33. biological marker/
34. biomarker\$.ti,ab,kw.
35. predict\$.ti,ab,kw.
36. predictive value/
37. "sensitivity and specificity"/
38. receiver operating characteristic/
39. Sensitivity.ti,ab,kw.
40. Specificity.ti,ab,kw.
41. Or/33-40
42. Respons\$.ti,ab,kw.
43. Remission.ti,ab,kw.
44. "Disease activity".ti,ab,kw.
45. ACR-20.ti,ab,kw.
46. ACR-50.ti,ab,kw.
47. ACR-70.ti,ab,kw.
48. DAS.ti,ab,kw.
49. DAS28.ti,ab,kw.
50. DAS44.ti,ab,kw.
51. CDAI.ti,ab,kw.
52. SDAI.ti,ab,kw.
53. Or/42-52
54. 3 and 32 and 41 and 53

## Search strategy – Pubmed

1. "rheumatoid arthritis"[Title/Abstract]
2. Arthritis, Rheumatoid[Mesh:NoExp]
3. 1 or 2
4. Adalimumab[Title/Abstract]
5. bDMARD\*[Title/Abstract]
6. "biologic\* DMARD\*" [Title/Abstract]
7. Humira[Title/Abstract]
8. "Adalimumab"[Mesh:noexp]
9. Certolizumab[Title/Abstract]
10. Cimzia[Title/Abstract]
11. "Certolizumab Pegol"[Mesh:noexp]
12. Etanercept[Title/Abstract]
13. Enbrel[Title/Abstract]
14. Benepali[Title/Abstract]
15. "Etanercept"[Mesh:noexp]
16. Golimumab[Title/Abstract]
17. Simponi[Title/Abstract]
18. Infliximab[Title/Abstract]
19. Remicade[Title/Abstract]
20. Remsima[Title/Abstract]
21. Inflectra[Title/Abstract]
22. "Infliximab"[Mesh:noexp]
23. "Tumor Necrosis Factor-alpha/antagonists and inhibitors"[Mesh:noexp]
24. "anti-tnf"[Title/Abstract]
25. "anti-tumor necrosis factor"[Title/Abstract]
26. "anti-tumour necrosis factor"[Title/Abstract]
27. "tnfi"[Title/Abstract]
28. "tnf inhibition"[Title/Abstract]
29. "tnf inhibitor"[Title/Abstract]
30. "tnf inhibitors"[Title/Abstract]
31. Or/4-30
32. Biological Markers[Mesh:NoExp]
33. biomarker\*[Title/Abstract]
34. predict\*[Title/Abstract]
35. Predictive Value of Tests[Mesh:NoExp]
36. Sensitivity and Specificity[Mesh:NoExp]
37. ROC Curve[Mesh:NoExp]
38. Sensitivity[Title/Abstract]
39. Specificity[Title/Abstract]
40. Or/32-39
41. Respons\*[tiab]
42. Remission[tiab]
43. "Disease activity"[tiab]
44. "ACR 20"[tiab]
45. "ACR 50"[tiab]
46. "ACR 70"[tiab]
47. DAS[tiab]
48. DAS28[tiab]
49. DAS44[tiab]
50. CDAI[tiab]
51. SDAI[tiab]
52. Or/41-51
53. 3 and 31 and 40 and 52

## Search strategy – Cochrane library

1. MeSH descriptor: [Arthritis, Rheumatoid] this term only
2. (rheumatoid arthritis):ti,ab,kw
3. 1 or 2
4. Adalimumab:ti,ab,kw
5. bDMARD\*:ti,ab,kw
6. "biologic\* DMARD\*":ti,ab,kw
7. Humira:ti,ab,kw
8. MeSH descriptor: [Adalimumab] this term only
9. Certolizumab:ti,ab,kw
10. Cimzia:ti,ab,kw
11. MeSH descriptor: [Certolizumab Pegol] this term only
12. Etanercept:ti,ab,kw
13. Enbrel:ti,ab,kw
14. Benepali:ti,ab,kw
15. MeSH descriptor: [Etanercept] this term only
16. Golimumab:ti,ab,kw
17. Simponi:ti,ab,kw
18. Infliximab:ti,ab,kw
19. Remicade:ti,ab,kw
20. Remsima:ti,ab,kw
21. Inflectra:ti,ab,kw
22. MeSH descriptor: [Infliximab] this term only
23. MeSH descriptor: [Tumor Necrosis Factor Inhibitors] this term only
24. "anti-tnf":ti,ab,kw
25. "anti-tumor necrosis factor":ti,ab,kw
26. "anti-tumour necrosis factor":ti,ab,kw
27. "tnfi":ti,ab,kw
28. "tnf inhibition":ti,ab,kw
29. "tnf inhibitor":ti,ab,kw
30. "tnf inhibitors":ti,ab,kw
31. Or/4-30
32. Biological Markers[Mesh:NoExp]
33. biomarker\*:ti,ab,kw
34. predict\*:ti,ab,kw
35. Predictive Value of Tests[Mesh:NoExp]
36. Sensitivity and Specificity[Mesh:NoExp]
37. ROC Curve[Mesh:NoExp]
38. sensitivity:ti,ab,kw
39. specificity:ti,ab,kw
40. or/32-39
41. Respons\*:ti,ab,kw
42. Remission:ti,ab,kw
43. "Disease activity":ti,ab,kw
44. "ACR 20":ti,ab,kw
45. "ACR 50":ti,ab,kw
46. "ACR 70":ti,ab,kw
47. DAS:ti,ab,kw
48. DAS28:ti,ab,kw
49. DAS44:ti,ab,kw
50. CDAl:ti,ab,kw
51. SDAI:ti,ab,kw
52. Or/41-51
53. 3 and 31 and 40 and 52

## Supplementary file 2: Exclusion reasons full text judgement

| Author                         | Year | Reason of exclusion                     |
|--------------------------------|------|-----------------------------------------|
| Ajeganova, S., et al.          | 2011 | No Sensitivity/specificity calculatable |
| Akdemir, G., et al.            | 2016 | Definition of response                  |
| Alessandri, C., et al.         | 2004 | N<50                                    |
| Ammitzbøll, C. G., et al.      | 2013 | No sensitivity/specificity calculatable |
| Andersen, T., et al.           | 2015 | No sensitivity/specificity calculatable |
| Anechino, C., et al.           | 2015 | No sensitivity/specificity calculatable |
| Aterido, A., et al.            | 2019 | No sensitivity/specificity calculatable |
| Atzeni, F., et al.             | 2009 | No sensitivity/specificity calculatable |
| Atzeni, F., et al.             | 2014 | Duration of follow-up                   |
| Ayubi, E. and S. Safiri        | 2018 | No original data                        |
| Badot, V., et al.              | 2009 | N<50                                    |
| Baganz, L., et al.             | 2019 | No sensitivity/specificity calculatable |
| Baker, J. F., et al.           | 2012 | No sensitivity/specificity calculatable |
| Banse, C., et al.              | 2017 | N<50                                    |
| Barnabe, C., et al.            | 2014 | Duration of follow-up                   |
| Barrera, P., et al.            | 2002 | No sensitivity/specificity calculatable |
| Bazzichi, L., et al.           | 2012 | No original data                        |
| Bendtzen, K., et al.           | 2006 | Biomarker not at baseline               |
| Bergman, M. J., et al.         | 2020 | No original data                        |
| Bobbio-Pallavicini, F., et al. | 2007 | Duration of follow-up                   |
| Bosello, S., et al.            | 2011 | N<50                                    |
| Brahe, C. H., et al.           | 2019 | No sensitivity/specificity calculatable |
| Brahe, C. H., et al.           | 2018 | Duration of follow-up                   |
| Braun-Moscovici, Y., et al.    | 2006 | N<50                                    |
| Buch, M. H., et al.            | 2005 | No sensitivity/specificity calculatable |
| Buch, M. H., et al.            | 2008 | No laboratory biomarker                 |
| Burmester, G. R., et al.       | 2008 | Definition of response                  |
| Cacciapaglia, F., et al.       | 2014 | No sensitivity/specificity calculatable |
| Cacciapaglia, F., et al.       | 2014 | N<50                                    |
| Canet et al.                   | 2019 | No sensitivity/specificity calculatable |
| Canhão, H., et al.             | 2012 | No sensitivity/specificity calculatable |
| Canhão, H., et al.             | 2015 | No sensitivity/specificity calculatable |
| Castro-Villegas et al.         | 2015 | Biomarker not at baseline               |
| Ceccarelli, F., et al.         | 2012 | No sensitivity/specificity calculatable |
| Chara, L., et al.              | 2012 | N<50                                    |
| Chatzikyriakidou, A., et al.   | 2007 | Duration of follow-up                   |
| Chen, D. Y., et al.            | 2011 | N<50                                    |
| Cheng et al                    | 2020 | No sensitivity/specificity calculatable |
| Choi, B. Y., et al.            | 2014 | N<50                                    |
| Ciechomska, M., et al.         | 2018 | N<50                                    |
| Citro, A., et al.              | 2015 | N<50                                    |
| Conigliaro, P., et al.         | 2017 | No sensitivity/specificity calculatable |
| Criswell, L. A., et al.        | 2004 | Duration of follow-up                   |
| Cuchacovich, M., et al.        | 2004 | N<50                                    |
| Cuchacovich, M., et al.        | 2008 | No sensitivity/specificity calculatable |
| Cui, J., et al.                | 2013 | No sensitivity/specificity calculatable |
| Cui, J., et al.                | 2017 | Biomarker not predefined                |
| Cuppen, B. V. J., et al.       | 2018 | Exclusion of moderate responders        |
| Cuppen, B. V., et al.          | 2016 | N<50                                    |
| Cuppen, B. V., et al.          | 2016 | Exclusion of moderate responders        |

|                               |      |                                         |
|-------------------------------|------|-----------------------------------------|
| Cuppen, B., et al.            | 2018 | No sensitivity/specificity calculatable |
| Curtis, J. R., et al.         | 2012 | N<50                                    |
| Curtis, J. R., et al.         | 2013 | Not solely TNFi                         |
| Curtis, J. R., et al.         | 2018 | Not solely TNFi                         |
| Daïen, C. I., et al.          | 2014 | N<50                                    |
| Dejaco, C., et al.            | 2009 | N<50                                    |
| Dejaco, C., et al.            | 2010 | N<50                                    |
| Dennis, G., Jr., et al.       | 2014 | No sensitivity/specificity calculatable |
| Di Muzio, G., et al.          | 2011 | No sensitivity/specificity calculatable |
| Dirven, L., et al.            | 2012 | Definition of response                  |
| Ellegaard, K., et al.         | 2011 | Definition of response                  |
| Ercan, A., et al.             | 2012 | No sensitivity/specificity calculatable |
| Erlandsson, M. C., et al.     | 2012 | No sensitivity/specificity calculatable |
| Ernestam, S., et al.          | 2007 | N<50                                    |
| Fabre, S., et al.             | 2008 | N<50                                    |
| Fernández-Nebro, A., et al.   | 2007 | Definition of response                  |
| Ferreiro-Iglesias, A., et al. | 2019 | No sensitivity/specificity calculatable |
| Ferreiro-Iglesias, A., et al. | 2016 | No sensitivity/specificity calculatable |
| Folkersen, L., et al.         | 2016 | No sensitivity/specificity calculatable |
| Fu, J., et al.                | 2018 | Not solely TNFi                         |
| Gabay, C., et al.             | 2020 | Definition of response                  |
| García-Arias, M., et al.      | 2013 | N<50                                    |
| González-Alvaro, I., et al.   | 2007 | No sensitivity/specificity calculatable |
| Guan, Y., et al.              | 2019 | No sensitivity/specificity calculatable |
| Guo, X., et al.               | 2019 | Duration of follow-up                   |
| Halvorsen, E. H., et al.      | 2009 | N<50                                    |
| Hamann, P. D. H., et al.      | 2019 | No sensitivity/specificity calculatable |
| Hambardzumyan, K., et al.     | 2019 | No sensitivity/specificity calculatable |
| Hambardzumyan, K., et al.     | 2017 | Duration of follow-up                   |
| Han, B. K., et al.            | 2016 | N<50                                    |
| Hattori, Y., et al.           | 2018 | No sensitivity/specificity calculatable |
| Hayashi, S., et al.           | 2016 | N<50                                    |
| Hirata, S., et al.            | 2015 | N<50                                    |
| Honne, K., et al.             | 2016 | Biomarker not predefined                |
| Hoxha, A., et al.             | 2016 | N<50                                    |
| Huang, Q. L., et al.          | 2017 | Biomarker not predefined                |
| Hueber, W., et al.            | 2009 | N<50                                    |
| Isgren, A., et al.            | 2012 | Cross sectional                         |
| Izumi, K., et al.             | 2015 | No sensitivity/specificity calculatable |
| Jančić et al.                 | 2013 | No original data                        |
| Jonsdottir, T., et al.        | 2004 | N<50                                    |
| Julià A et al.                | 2015 | No sensitivity/specificity calculatable |
| Julià A et al.                | 2021 | No sensitivity/specificity calculatable |
| Karlsson, J. A., et al.       | 2008 | No laboratory biomarker                 |
| Kastbom A. et al.             | 2007 | No sensitivity/specificity calculatable |
| Kavanaugh, A., et al.         | 2013 | No laboratory biomarker                 |
| Kim, T. H., et al.            | 2014 | No original data                        |
| Klaasen R. et al.             | 2010 | No original data                        |
| Kleinert, S., et al.          | 2012 | No laboratory biomarker                 |
| Kobayashi, T., et al.         | 2016 | N<50                                    |
| Koga, T., et al.              | 2011 | N<50                                    |
| Koiwa, M., et al.             | 2016 | No sensitivity/specificity calculatable |
| Krintel, S. B., et al.        | 2016 | No sensitivity/specificity calculatable |

|                             |      |                                         |
|-----------------------------|------|-----------------------------------------|
| Kubo, S., et al.            | 2018 | No sensitivity/specificity calculatable |
| Levitsky, A., et al.        | 2015 | Duration of follow-up                   |
| Ling, S. F., et al.         | 2020 | Not solely TNFi                         |
| Liu, C., et al.             | 2008 | Biomarker not predefined                |
| Lopez-Rodriguez, R., et al. | 2018 | No sensitivity/specificity calculatable |
| Magill, L., et al.          | 2018 | N<50                                    |
| Mancarella, L., et al.      | 2007 | Exclusion of patient group              |
| Marotte, H., et al.         | 2008 | Same data (Marotte 2006 included)       |
| Márquez, A., et al.         | 2014 | No sensitivity/specificity calculatable |
| Martin, W. J., et al.       | 2014 | No laboratory biomarker                 |
| Marwa, O. S., et al.        | 2017 | Not solely TNFi                         |
| Massey, J., et al.          | 2018 | Biomarker not predefined                |
| Mirkov, M. U., et al.       | 2013 | No sensitivity/specificity calculatable |
| Misko, T. P., et al.        | 2013 | N<50                                    |
| Miwa, Y., et al.            | 2017 | Other bDMARD                            |
| Miwa, Y., et al.            | 2017 | No sensitivity/specificity calculatable |
| Miyoshi, F., et al.         | 2016 | N<50                                    |
| Mohammed, R. H., et al.     | 2015 | No sensitivity/specificity calculatable |
| Möller, B., et al.          | 2018 | Definition of response                  |
| Montes, A., et al.          | 2014 | No sensitivity/specificity calculatable |
| Mourão, A. F., et al.       | 2017 | No sensitivity/specificity calculatable |
| Mugnier, B. and J. Roudier  | 2004 | Editorial                               |
| Nair, S. C., et al.         | 2016 | No sensitivity/specificity calculatable |
| Nair, S. C., et al.         | 2016 | Editorial                               |
| Nakagawa, J., et al.        | 2017 | No sensitivity/specificity calculatable |
| Nakamura, S., et al.        | 2016 | Biomarker not predefined                |
| Nguyen, D. X., et al.       | 2018 | N<50                                    |
| Nguyen, M. V. C., et al.    | 2018 | No sensitivity/specificity calculatable |
| Niki, Y. and T. Takeuchi    | 2012 | Not in English                          |
| Nordal, H. H., et al.       | 2017 | No sensitivity/specificity calculatable |
| Nozaki, Y., et al.          | 2010 | N<50                                    |
| Obry, A., et al.            | 2014 | N<50                                    |
| Ongaro, A., et al.          | 2008 | Exclusion of patient group              |
| Ortea, I., et al.           | 2012 | N<50                                    |
| Ortea, I., et al.           | 2016 | N<50                                    |
| Oswald, M., et al.          | 2015 | Biomarker not predefined                |
| Page, T. H., et al.         | 2012 | No sensitivity/specificity calculatable |
| Paran, D., et al.           | 2018 | N<50                                    |
| Pérez-Sánchez, C., et al.   | 2017 | No sensitivity/specificity calculatable |
| Plant, D., et al.           | 2011 | No sensitivity/specificity calculatable |
| Plant, D., et al.           | 2012 | No sensitivity/specificity calculatable |
| Plant, D., et al.           | 2016 | No sensitivity/specificity calculatable |
| Pomirleanu, C., et al.      | 2013 | No sensitivity/specificity calculatable |
| Potter, C., et al.          | 2009 | No sensitivity/specificity calculatable |
| Ranganathan, P.             | 2015 | No original data                        |
| Rinaudo-Gaujous, M., et al. | 2019 | No sensitivity/specificity calculatable |
| Sande, J. S., et al.        | 2019 | No sensitivity/specificity calculatable |
| Santos-Moreno, P., et al.   | 2019 | Duration of follow-up                   |
| Schotte, H., et al.         | 2005 | Duration of follow-up                   |
| Schotte, H., et al.         | 2015 | Duration of follow-up                   |
| Seitz, M., et al.           | 2007 | No sensitivity/specificity calculatable |
| Sieberts, S. K., et al.     | 2016 | No sensitivity/specificity calculatable |
| Smith, S. L., et al.        | 2015 | No sensitivity/specificity calculatable |

|                                      |      |                                         |
|--------------------------------------|------|-----------------------------------------|
| <b>Smith, S. L., et al.</b>          | 2016 | Exclusion of moderate responders        |
| <b>Smith, S. L., et al.</b>          | 2017 | No sensitivity/specificity calculatable |
| <b>Smolen, J. S., et al.</b>         | 2018 | MTX                                     |
| <b>Smolen, J. S., et al.</b>         | 2018 | No sensitivity/specificity calculatable |
| <b>Sode J. et al.</b>                | 2015 | Duration of follow-up                   |
| <b>Sode, J., et al.</b>              | 2018 | No sensitivity/specificity calculatable |
| <b>Sode, J., et al.</b>              | 2018 | No sensitivity/specificity calculatable |
| <b>Soriano, E. R., et al.</b>        | 2018 | No sensitivity/specificity calculatable |
| <b>Soto, L., et al.</b>              | 2011 | Exclusion of patient group              |
| <b>Spiliopoulou, A., et al.</b>      | 2019 | No sensitivity/specificity calculatable |
| <b>Suarez-Gestal, M., et al.</b>     | 2010 | No sensitivity/specificity calculatable |
| <b>Takeuchi, T., et al.</b>          | 2011 | No sensitivity/specificity calculatable |
| <b>Takeuchi, T., et al.</b>          | 2017 | No sensitivity/specificity calculatable |
| <b>Tatar, Z., et al.</b>             | 2016 | Exclusion of moderate responders        |
| <b>Thomson, T. M., et al.</b>        | 2015 | Duration of follow-up                   |
| <b>Torices, S., et al.</b>           | 2016 | No sensitivity/specificity calculatable |
| <b>Trocme, C., et al.</b>            | 2009 | Exclusion of patient group              |
| <b>Tsukahara, S., et al.</b>         | 2008 | N<50                                    |
| <b>Tsuzaka, K., et al.</b>           | 2010 | Duration of follow-up                   |
| <b>Tweehuysen, L., et al.</b>        | 2018 | Definition of response                  |
| <b>Tweehuysen, L., et al.</b>        | 2019 | No laboratory biomarker                 |
| <b>Tweehuysen, L., et al.</b>        | 2018 | No sensitivity/specificity calculatable |
| <b>Umičević Mirkov, M., et al.</b>   | 2013 | Biomarker not predefined                |
| <b>Uno, K., et al.</b>               | 2015 | N<50                                    |
| <b>Váradi, C., et al.</b>            | 2015 | No sensitivity/specificity calculatable |
| <b>Vasilopoulos, Y., et al.</b>      | 2011 | Exclusion of moderate responders        |
| <b>Vastesaegeer, N., et al.</b>      | 2016 | No sensitivity/specificity calculatable |
| <b>Visvanathan, S., et al.</b>       | 2007 | No sensitivity/specificity calculatable |
| <b>Visvanathan, S., et al.</b>       | 2009 | No sensitivity/specificity calculatable |
| <b>Visvanathan, S., et al.</b>       | 2010 | Biomarker not at baseline               |
| <b>Wampler Muskardin, T., et al.</b> | 2020 | No sensitivity/specificity calculatable |
| <b>Wielńska, J., et al.</b>          | 2020 | No sensitivity/specificity calculatable |
| <b>Wolbink, G. J., et al.</b>        | 2005 | Biomarker not at baseline               |
| <b>Yazici, S., et al.</b>            | 2010 | N<50                                    |
| <b>Yuasa, S., et al.</b>             | 2013 | No sensitivity/specificity calculatable |
| <b>Yukawa, N., et al.</b>            | 2011 | Duration of follow-up                   |
| <b>Yunchun, L., et al.</b>           | 2018 | No sensitivity/specificity calculatable |
| <b>Zervou, M. I., et al.</b>         | 2013 | No sensitivity/specificity calculatable |

**Supplementary file 3: Risk of bias assessment for included studies using the QUIPS tool<sup>1</sup> (n=41).**

|                                      | Study Participation | Study Attrition | Prognostic factor Measurement | Outcome Measurement |
|--------------------------------------|---------------------|-----------------|-------------------------------|---------------------|
| <b>Abhishek et al. (1)</b>           | Low                 | High            | Moderate                      | Low                 |
| <b>Acosta-Colman et al. (2)</b>      | Moderate            | Low             | Low                           | Low                 |
| <b>Avila-Pedretti et al. (3)</b>     | Moderate            | Low             | Low                           | Low                 |
| <b>Blaschke et al. (4)</b>           | Moderate            | Low             | Low                           | Low                 |
| <b>Bystrom et al. (5)</b>            | Moderate            | High            | Moderate                      | Low                 |
| <b>Cañete et al. (6)</b>             | Moderate            | Moderate        | Low                           | Low                 |
| <b>Cañete et al. (7)</b>             | High                | Low             | Low                           | Low                 |
| <b>Choi et al. (8)</b>               | Moderate            | Low             | Moderate                      | Low                 |
| <b>Conigliaro et al. (9)</b>         | Low                 | Low             | Low                           | Low                 |
| <b>Coulthard et al. (10)</b>         | Low                 | High            | Low                           | Low                 |
| <b>Cuchacovich et al. (11)</b>       | Moderate            | Low             | Low                           | Low                 |
| <b>Dávila-Fajardo et al. (12)</b>    | Moderate            | Low             | Low                           | Low                 |
| <b>Dávila-Fajardo et al. (13)</b>    | Moderate            | Low             | Low                           | Low                 |
| <b>Ding et al. (14)</b>              | Moderate            | Moderate        | Moderate                      | Low                 |
| <b>Fisher et al. (15)</b>            | Low                 | Low             | Low                           | Low                 |
| <b>Guis et al. (16)</b>              | Moderate            | Low             | Low                           | Low                 |
| <b>Hyrich et al. (17)</b>            | Low                 | Moderate        | Low                           | Low                 |
| <b>Iwaszko et al. (18)</b>           | Moderate            | Moderate        | Low                           | Low                 |
| <b>Iwaszko et al. (19)</b>           | Moderate            | Low             | Low                           | Low                 |
| <b>Jamnitski et al. (20)</b>         | Low                 | Moderate        | Low                           | Low                 |
| <b>Jancic et al. (21)</b>            | Low                 | Low             | Low                           | Low                 |
| <b>Kang et al. (22)</b>              | Moderate            | Low             | Low                           | Low                 |
| <b>Klaasen et al. (23)</b>           | Low                 | Low             | Low                           | Low                 |
| <b>Lee et al. (24)</b>               | Moderate            | Moderate        | Moderate                      | Low                 |
| <b>Lequerré et al. (25)</b>          | Low                 | Low             | Low                           | Low                 |
| <b>Marotte et al. (26)</b>           | Low                 | Low             | Low                           | Low                 |
| <b>Matsudaira et al. (27)</b>        | Moderate            | Low             | Low                           | Low                 |
| <b>McGeough et al. (28)</b>          | High                | Low             | Low                           | Low                 |
| <b>Miceli-Richard et al. (29)</b>    | Moderate            | Low             | Low                           | Low                 |
| <b>Montes et al. (30)</b>            | Moderate            | Low             | Moderate                      | Low                 |
| <b>Morales-Lara et al. (31)</b>      | High                | Low             | Low                           | Low                 |
| <b>Mugnier et al. (32)</b>           | Low                 | Low             | Low                           | Low                 |
| <b>Nishimoto et al. (33)</b>         | Moderate            | Low             | Low                           | Low                 |
| <b>Padyukov et al. (34)</b>          | Moderate            | Low             | Low                           | Low                 |
| <b>Pers et al. (35)</b>              | High                | Low             | Low                           | Low                 |
| <b>Radstake et al. (36)</b>          | Moderate            | Low             | Low                           | Low                 |
| <b>Salgado et al. (37)</b>           | High                | Low             | Low                           | Low                 |
| <b>Shi et al. (38)</b>               | Low                 | Low             | Low                           | Low                 |
| <b>Skapenko et al. (39)</b>          | Moderate            | Low             | Low                           | Low                 |
| <b>Wampler Muskardin et al. (40)</b> | Moderate            | Low             | Low                           | Low                 |
| <b>Zhao et al. (41)</b>              | Moderate            | Low             | Low                           | Low                 |

<sup>1</sup>Items 5. Study Confounding and 6. Statistical Analysis and Reporting were not scored because we extracted unadjusted and unanalyzed data from the studies.



## Supplementary file 4: Biomarkers studied once or twice

| Author          | Biomarker                              | Response criteria | Total n    | Sensitivity | Specificity | PPV  | NPV  | LL+  | LL- |
|-----------------|----------------------------------------|-------------------|------------|-------------|-------------|------|------|------|-----|
| Acosta-Colman   | PDE3A–SLCO1C1 (rs3794271)              | EULAR             | 313        | 0.93        | 0.18        | 0.78 | 0.45 | 1.13 | 0.4 |
| Bystrom*        | GM-CSF                                 | EULAR**           | 97         | 0.82        | 0.71        | 0.88 | -    | 2.88 | 0.2 |
| Canete1         | DS-TNFR2                               | EULAR             | 64         | 0.27        | 0.74        | 0.71 | 0.30 | 1.01 | 1.0 |
| Choi*           | MRP8/14 (calprotectin)                 | EULAR             | ADA:       | 0.57        | 0.71        | 0.86 | 0.35 | 1.97 | 0.6 |
|                 |                                        |                   | 86 IFX: 60 | 0.62        | 0.86        | 0.93 | 0.43 | 4.43 | 0.4 |
| Conigliaro      | PSORS1C1 (rs2233945) C>A               | EULAR             | 163        | 0.34        | 0.55        | 0.67 | 0.23 | 0.74 | 1.2 |
| Conigliaro      | PTPN2 (rs7234029) A>G                  | EULAR             | 160        | 0.27        | 0.60        | 0.65 | 0.23 | 0.67 | 1.2 |
| Conigliaro      | STAT4 (rs7574865) G>T                  | EULAR             | 163        | 0.44        | 0.45        | 0.68 | 0.23 | 0.80 | 1.2 |
| Conigliaro      | TRAF3IP2 (rs33980500) C>T              | EULAR             | 162        | 0.13        | 0.84        | 0.68 | 0.26 | 0.80 | 1.0 |
| Coulthard       | MAP2K6 (rs11656130) T/G                | EULAR             | 918        | 0.68        | 0.22        | 0.78 | 0.14 | 0.87 | 1.5 |
| Coulthard       | MAP2K6 (rs2716191) T/C                 | EULAR             | 905        | 0.71        | 0.34        | 0.81 | 0.23 | 1.08 | 0.9 |
| Coulthard       | MAPK14 (rs916344) C/G                  | EULAR             | 918        | 0.52        | 0.49        | 0.81 | 0.20 | 1.02 | 1.0 |
| Coulthard       | MAPKAPK2 (rs4240847) C/A               | EULAR             | 901        | 0.43        | 0.47        | 0.77 | 0.17 | 0.81 | 1.2 |
| Coulthard       | RPS6KA4 (rs475032) G/C                 | EULAR             | 903        | 0.61        | 0.39        | 0.80 | 0.20 | 1.00 | 1.0 |
| Coulthard       | RPS6KA5 (rs1286076) C/T                | EULAR             | 900        | 0.47        | 0.53        | 0.80 | 0.20 | 1.01 | 1.0 |
| Coulthard       | RPS6KA5 (rs1286112) C/G                | EULAR             | 920        | 0.47        | 0.50        | 0.79 | 0.19 | 0.94 | 1.1 |
| Davila-Fajardo2 | IL-6 (rs1800795) C/G                   | EULAR             | 191        | 0.91        | 0.10        | 0.85 | 0.17 | 1.01 | 0.9 |
| Ding*           | ESR                                    | ACR20             | 90         | 0.88        | 0.61        | -    | -    | 2.24 | 0.2 |
| Ding*           | IL-34                                  | ACR20             | 90         | 0.77        | 0.71        | -    | -    | 2.67 | 0.3 |
| Fisher          | Anti-CEP-1                             | EULAR             | 450        | 0.38        | 0.59        | 0.78 | 0.21 | 0.94 | 1.0 |
| Fisher          | Anti-cFib                              | EULAR             | 436        | 0.74        | 0.22        | 0.78 | 0.19 | 0.95 | 1.2 |
| Fisher          | Anti-cVim                              | EULAR             | 436        | 0.42        | 0.59        | 0.79 | 0.21 | 1.03 | 1.0 |
| Iwaszko         | NKG2D (rs1049174) C/G                  | EULAR             | 270        | 0.56        | 0.43        | 0.95 | 0.05 | 0.98 | 1.0 |
| Iwaszko         | NKG2D (rs1154831) C/A                  | EULAR             | 270        | 0.33        | 0.64        | 0.94 | 0.05 | 0.92 | 1.0 |
| Iwaszko         | NKG2D (rs2255336) G/A                  | EULAR             | 270        | 0.38        | 0.71        | 0.96 | 0.06 | 1.33 | 0.9 |
| Iwaszko         | HLA-E rs1264457                        | EULAR             | 209        | 0.67        | 0.27        | 0.94 | 0.04 | 0.92 | 1.2 |
| Iwaszko         | HLA-E rs1059150                        | EULAR             | 198        | 0.55        | 0.18        | 0.92 | 0.02 | 0.67 | 2.5 |
| Jamnitski       | Anti-IFX or anti-ADA                   | EULAR             | 89         | 0.61        | 0.78        | 0.91 | 0.33 | 2.73 | 0.5 |
| Jančić          | IL-6 –174G/C                           | ΔDAS>1.2          | 73         | 0.11        | 0.82        | 0.78 | 0.14 | 0.62 | 1.1 |
| Jančić          | combined IL-6 + TNFa (GC/GG reference) | ΔDAS>1.2          | 73         | 0.61        | 0.36        | 0.84 | 0.14 | 0.96 | 1.1 |
| Lee             | NLR                                    | EULAR             | 73         | 0.46        | 0.67        | 0.94 | 0.10 | 1.39 | 0.8 |

|                          |                                |                     |     |      |      |      |      |      |     |
|--------------------------|--------------------------------|---------------------|-----|------|------|------|------|------|-----|
| <b>Lee</b>               | PLR                            | EULAR               | 73  | 0.46 | 0.50 | 0.91 | 0.08 | 0.93 | 1.1 |
| <b>Lequerré</b>          | ACAST-C27                      | EULAR               | 76  | 0.09 | 0.86 | 0.50 | 0.37 | 0.62 | 1.1 |
| <b>Lequerré</b>          | ACAST-DI                       | EULAR               | 76  | 0.17 | 0.93 | 0.80 | 0.41 | 2.47 | 0.9 |
| <b>Lequerré</b>          | AKA                            | EULAR               | 76  | 0.36 | 0.59 | 0.59 | 0.36 | 0.87 | 1.1 |
| <b>Lequerré</b>          | Anti-a-enolase                 | EULAR               | 76  | 0.30 | 0.79 | 0.70 | 0.41 | 1.44 | 0.9 |
| <b>Lequerré</b>          | anti-G6PI                      | EULAR               | 76  | 0.11 | 0.86 | 0.56 | 0.37 | 0.77 | 1.0 |
| <b>Lequerré</b>          | APF                            | EULAR               | 76  | 0.53 | 0.34 | 0.57 | 0.31 | 0.81 | 1.4 |
| <b>Lequerré</b>          | DPYD                           | EULAR               | 76  | 1.00 | 0.03 | 0.63 | 1.00 | 1.04 | 0.0 |
| <b>Lequerré</b>          | OPG                            | EULAR               | 76  | 1.00 | 0.07 | 0.64 | 1.00 | 1.07 | 0.0 |
| <b>Lequerré</b>          | PYD                            | EULAR               | 76  | 0.74 | 0.21 | 0.60 | 0.33 | 0.94 | 1.2 |
| <b>Lequerré</b>          | sRANKL                         | EULAR               | 76  | 0.17 | 0.76 | 0.53 | 0.36 | 0.71 | 1.1 |
| <b>Marotte</b>           | IL-1B (+3954)                  | ACR20               | 198 | 0.37 | 0.49 | 0.59 | 0.29 | 0.74 | 1.3 |
| <b>Marotte</b>           | IL-1RN (+2018)                 | ACR20               | 262 | 0.44 | 0.56 | 0.50 | 0.50 | 1.00 | 1.0 |
| <b>Matsudaira</b>        | ANA                            | EULAR               | 188 | 0.94 | 0.13 | 0.80 | 0.36 | 1.08 | 0.5 |
| <b>Matsudaira</b>        | Anti-dsDNA                     | EULAR               | 187 | 0.02 | 0.90 | 0.43 | 0.19 | 0.20 | 1.1 |
| <b>Matsudaira</b>        | Anti-La/SSA antibodies         | EULAR               | 188 | 0.02 | 1.00 | 1.00 | 0.21 | ∞    | 1.0 |
| <b>Matsudaira</b>        | Anti-Ro/SSA antibodies         | EULAR               | 188 | 0.12 | 0.67 | 0.58 | 0.17 | 0.36 | 1.3 |
| <b>McGeough</b>          | KIR2DS2                        | ΔDAS>1.2 or DAS<3.2 | 64  | 0.68 | 0.67 | 0.70 | 0.65 | 1.68 | 0.7 |
| <b>McGeough</b>          | HLA-C heterozygous /homozygous | ΔDAS>1.2 or DAS<3.2 | 64  | 0.56 | 0.67 | 0.66 | 0.57 | 2.03 | 0.5 |
| <b>Montes</b>            | FCGR2B rs1050501 T/C           | EULAR               | 377 | 0.27 | 0.79 | 0.84 | 0.22 | 1.32 | 0.9 |
| <b>Montes</b>            | FCGR3A rs396991 T/G            | EULAR               | 408 | 0.64 | 0.23 | 0.70 | 0.19 | 0.84 | 1.5 |
| <b>Montes</b>            | FCRGT 3/3 / 2/3                | EULAR               | 251 | 0.18 | 0.71 | 0.71 | 0.18 | 0.61 | 1.2 |
| <b>Morales-Lara</b>      | TRAILR1 rs20575                | EULAR               | 89  | 0.66 | 0.88 | 0.90 | 0.60 | 5.45 | 0.4 |
| <b>Morales-Lara</b>      | TNFR1A rs767455                | EULAR               | 89  | 0.32 | 0.73 | 0.67 | 0.39 | 1.18 | 0.9 |
| <b>Nishimoto</b>         | TRAF1 (+16860) A/G             | EULAR               | 101 | 0.46 | 0.20 | 0.84 | 0.04 | 0.58 | 2.7 |
| <b>Padyukov</b>          | IL-10 G/A                      | ACR20 or EULAR      | 123 | 0.73 | 0.33 | 0.82 | 0.23 | 1.09 | 0.8 |
| <b>Padyukov</b>          | IL1RN A1/A2                    | ACR20 or EULAR      | 123 | 0.30 | 0.46 | 0.70 | 0.14 | 0.56 | 1.5 |
| <b>Padyukov</b>          | TGFB1 G/C                      | ACR20 or EULAR      | 123 | 0.15 | 0.83 | 0.79 | 0.19 | 0.91 | 1.0 |
| <b>Radstake</b>          | MIF-173 G/C                    | EULAR               | 90  | 0.41 | 0.77 | 0.81 | 0.34 | 1.76 | 0.8 |
| <b>Radstake</b>          | MIF-CATT7                      | EULAR               | 90  | 0.27 | 0.85 | 0.81 | 0.32 | 1.73 | 0.9 |
| <b>Shi*</b>              | IL-6 + survivin combined       | ΔDAS>1.2            | 69  | 0.80 | 0.91 | -    | -    | 9.24 | 0.2 |
| <b>Skapenko</b>          | FcyRIIb (rs1050501) T/C        | DAS<3.2             | 443 | 0.21 | 0.83 | 0.52 | 0.56 | 1.29 | 0.9 |
| <b>Skapenko</b>          | IL4R (rs1805010) A/G           | DAS<3.2             | 443 | 0.66 | 0.32 | 0.45 | 0.53 | 0.97 | 1.1 |
| <b>Wampler Muskardin</b> | IFN-B/a ratio                  | EULAR               | 79  | 0.74 | 0.54 | 0.65 | 0.65 | 1.61 | 0.5 |
| <b>Marotte</b>           | TNFA (-238)                    | ACR20               | 262 | 0.03 | 0.97 | 0.50 | 0.50 | 1.00 | 1.0 |
| <b>Miceli-Richard</b>    | TNFA (-238)                    | ACR50               | 360 | 0.08 | 0.96 | 0.57 | 0.60 | 1.93 | 1.0 |
| <b>Miceli-Richard</b>    | TNFA (-857) C/T                | ACR50               | 357 | 0.21 | 0.86 | 0.51 | 0.61 | 1.49 | 0.9 |
| <b>Kang</b>              | TNFA (-857) C/T                | ACR20               | 70  | 0.43 | 0.90 | 0.96 | 0.21 | 4.33 | 0.6 |
| <b>Davila-Fajardo3</b>   | FcGR3A (rs396991) F/V          | EULAR**             | 301 | 0.62 | 0.38 | 0.53 | 0.47 | 1.00 | 1.0 |

|                |                          |       |    |      |      |      |      |      |     |
|----------------|--------------------------|-------|----|------|------|------|------|------|-----|
| <b>Canete4</b> | FcGR3A (rs396991)<br>F/V | EULAR | 77 | 0.57 | 0.33 | 0.57 | 0.33 | 0.86 | 1.3 |
|----------------|--------------------------|-------|----|------|------|------|------|------|-----|

\*No absolute values given

\*\*EULAR good response versus moderate + non responders

<sup>1</sup> Canete et al. 2011

<sup>2</sup> Davila-Fajardo et al. 2014

<sup>3</sup> Davila-Fajardo et al. 2015

<sup>4</sup> Canete et al. 2009

## References

1. Abhishek A, Butt S, Gadsby K, Zhang W, Deighton CM. Anti-TNF-alpha agents are less effective for the treatment of rheumatoid arthritis in current smokers. *J Clin Rheumatol*. 2010;16(1):15-8.
2. Acosta-Colman I, Palau N, Tornero J, Fernández-Nebro A, Blanco F, González-Alvaro I, et al. GWAS replication study confirms the association of PDE3A-SLCO1C1 with anti-TNF therapy response in rheumatoid arthritis. *Pharmacogenomics*. 2013;14(7):727-34.
3. Avila-Pedretti G, Tornero J, Fernández-Nebro A, Blanco F, González-Alvaro I, Cañete JD, et al. Variation at FCGR2A and functionally related genes is associated with the response to anti-TNF therapy in rheumatoid arthritis. *PLoS One*. 2015;10(4):e0122088.
4. Blaschke S, Rinke K, Maring M, Flad T, Patschan S, Jahn O, et al. Haptoglobin- $\alpha$ 1, - $\alpha$ 2, vitamin D-binding protein and apolipoprotein C-III as predictors of etanercept drug response in rheumatoid arthritis. *Arthritis Res Ther*. 2015;17(1):45.
5. Bystrom J, Clanchy FI, Taher TE, Al-Bogami MM, Muhammad HA, Alzabin S, et al. Response to Treatment with TNF $\alpha$  Inhibitors in Rheumatoid Arthritis Is Associated with High Levels of GM-CSF and GM-CSF(+) T Lymphocytes. *Clin Rev Allergy Immunol*. 2017;53(2):265-76.
6. Cañete JD, Suárez B, Hernández MV, Sanmartí R, Rego I, Celis R, et al. Influence of variants of Fc gamma receptors IIA and IIIA on the American College of Rheumatology and European League Against Rheumatism responses to anti-tumour necrosis factor alpha therapy in rheumatoid arthritis. *Ann Rheum Dis*. 2009;68(10):1547-52.
7. Cañete JD, Albaladejo C, Hernández MV, Laínez B, Pinto JA, Ramírez J, et al. Clinical significance of high levels of soluble tumour necrosis factor- $\alpha$  receptor-2 produced by alternative splicing in rheumatoid arthritis: a longitudinal prospective cohort study. *Rheumatology (Oxford)*. 2011;50(4):721-8.
8. Choi IY, Gerlag DM, Herenius MJ, Thurlings RM, Wijbrandts CA, Foell D, et al. MRP8/14 serum levels as a strong predictor of response to biological treatments in patients with rheumatoid arthritis. *Ann Rheum Dis*. 2015;74(3):499-505.
9. Conigliaro P, Ciccacci C, Politi C, Triggianese P, Rufini S, Kroegler B, et al. Polymorphisms in STAT4, PTPN2, PSORS1C1 and TRAF3IP2 Genes Are Associated with the Response to TNF Inhibitors in Patients with Rheumatoid Arthritis. *PLoS One*. 2017;12(1):e0169956.
10. Coulthard LR, Taylor JC, Eyre S, Robinson JI, Wilson AG, Isaacs JD, et al. Genetic variants within the MAP kinase signalling network and anti-TNF treatment response in rheumatoid arthritis patients. *Ann Rheum Dis*. 2011;70(1):98-103.
11. Cuchacovich M, Soto L, Edwardes M, Gutierrez M, Llanos C, Pacheco D, et al. Tumour necrosis factor (TNF)alpha -308 G/G promoter polymorphism and TNFalpha levels correlate with a better response to adalimumab in patients with rheumatoid arthritis. *Scand J Rheumatol*. 2006;35(6):435-40.
12. Dávila-Fajardo CL, Márquez A, Pascual-Salcedo D, Moreno Ramos MJ, García-Portales R, Magro C, et al. Confirmation of -174G/C interleukin-6 gene promoter polymorphism as a genetic marker predicting antitumor necrosis factor treatment outcome. *Pharmacogenet Genomics*. 2014;24(1):1-5.
13. Dávila-Fajardo CL, van der Straaten T, Baak-Pablo R, Medarde Caballero C, Cabeza Barrera J, Huizinga TW, et al. FcGR genetic polymorphisms and the response to adalimumab in patients with rheumatoid arthritis. *Pharmacogenomics*. 2015;16(4):373-81.
14. Ding R, Li P, Song D, Zhang X, Bi L. Predictors of response to TNF- $\alpha$  antagonist therapy in Chinese rheumatoid arthritis. *Clin Rheumatol*. 2015;34(7):1203-10.
15. Fisher BA, Plant D, Lundberg K, Charles P, Barton A, Venables PJ. Heterogeneity of anticitrullinated peptide antibodies and response to anti-tumor necrosis factor agents in rheumatoid arthritis. *J Rheumatol*. 2012;39(5):929-32.
16. Guis S, Balandraud N, Bouvenot J, Auger I, Toussiroit E, Wendling D, et al. Influence of -308 A/G polymorphism in the tumor necrosis factor alpha gene on etanercept treatment in rheumatoid arthritis. *Arthritis Rheum*. 2007;57(8):1426-30.
17. Hyrich KL, Watson KD, Silman AJ, Symmons DP. Predictors of response to anti-TNF-alpha therapy among patients with rheumatoid arthritis: results from the British Society for Rheumatology Biologics Register. *Rheumatology (Oxford)*. 2006;45(12):1558-65.
18. Iwaszko M, Świerkot J, Kolossa K, Jeka S, Wiland P, Bogunia-Kubik K. Polymorphisms within the human leucocyte antigen-E gene and their associations with susceptibility to rheumatoid arthritis as well as clinical outcome of anti-tumour necrosis factor therapy. *Clin Exp Immunol*. 2015;182(3):270-7.
19. Iwaszko M, Świerkot J, Kolossa K, Jeka S, Wiland P, Bogunia-Kubik K. Influence of NKG2D Genetic Variants on Response to Anti-TNF Agents in Patients with Rheumatoid Arthritis. *Genes (Basel)*. 2018;9(2).

20. Jamnitski A, Bartelds GM, Nurmohamed MT, van Schouwenburg PA, van Schaardenburg D, Stapel SO, et al. The presence or absence of antibodies to infliximab or adalimumab determines the outcome of switching to etanercept. *Ann Rheum Dis*. 2011;70(2):284-8.
21. Jančić I, Šefik-Bukilica M, Živojinović S, Damjanov N, Spasovski V, Kotur N, et al. Influence of Promoter Polymorphisms of the TNF- $\alpha$  (-308G/A) and IL-6 (-174G/C) Genes on Therapeutic Response to Etanercept in Rheumatoid Arthritis. *J Med Biochem*. 2015;34(4):414-21.
22. Kang CP, Lee KW, Yoo DH, Kang C, Bae SC. The influence of a polymorphism at position -857 of the tumour necrosis factor alpha gene on clinical response to etanercept therapy in rheumatoid arthritis. *Rheumatology (Oxford)*. 2005;44(4):547-52.
23. Klaasen R, Cantaert T, Wijbrandts CA, Teitsma C, Gerlag DM, Out TA, et al. The value of rheumatoid factor and anti-citrullinated protein antibodies as predictors of response to infliximab in rheumatoid arthritis: an exploratory study. *Rheumatology (Oxford)*. 2011;50(8):1487-93.
24. Lee HN, Kim YK, Kim GT, Ahn E, So MW, Sohn DH, et al. Neutrophil-to-lymphocyte and platelet-to-lymphocyte ratio as predictors of 12-week treatment response and drug persistence of anti-tumor necrosis factor- $\alpha$  agents in patients with rheumatoid arthritis: a retrospective chart review analysis. *Rheumatol Int*. 2019;39(5):859-68.
25. Lequerré T, Jouen F, Brazier M, Clayssens S, Klemmer N, Ménard JF, et al. Autoantibodies, metalloproteinases and bone markers in rheumatoid arthritis patients are unable to predict their responses to infliximab. *Rheumatology (Oxford)*. 2007;46(3):446-53.
26. Marotte H, Pallot-Prades B, Grange L, Tebib J, Gaudin P, Alexandre C, et al. The shared epitope is a marker of severity associated with selection for, but not with response to, infliximab in a large rheumatoid arthritis population. *Ann Rheum Dis*. 2006;65(3):342-7.
27. Matsudaira R, Tamura N, Sekiya F, Ogasawara M, Yamanaka K, Takasaki Y. Anti-Ro/SSA antibodies are an independent factor associated with an insufficient response to tumor necrosis factor inhibitors in patients with rheumatoid arthritis. *J Rheumatol*. 2011;38(11):2346-54.
28. McGeough CM, Berrar D, Wright G, Mathews C, Gilmore P, Cunningham RT, et al. Killer immunoglobulin-like receptor and human leukocyte antigen-C genotypes in rheumatoid arthritis primary responders and non-responders to anti-TNF- $\alpha$  therapy. *Rheumatol Int*. 2012;32(6):1647-53.
29. Miceli-Richard C, Comets E, Verstuyft C, Tamouza R, Loiseau P, Ravaud P, et al. A single tumour necrosis factor haplotype influences the response to adalimumab in rheumatoid arthritis. *Ann Rheum Dis*. 2008;67(4):478-84.
30. Montes A, Perez-Pampin E, Joven B, Carreira P, Fernández-Nebro A, Del Carmen Ordóñez M, et al. FCGR polymorphisms in the treatment of rheumatoid arthritis with Fc-containing TNF inhibitors. *Pharmacogenomics*. 2015;16(4):333-45.
31. Morales-Lara MJ, Cañete JD, Torres-Moreno D, Hernández MV, Pedrero F, Celis R, et al. Effects of polymorphisms in TRAILR1 and TNFR1A on the response to anti-TNF therapies in patients with rheumatoid and psoriatic arthritis. *Joint Bone Spine*. 2012;79(6):591-6.
32. Mugnier B, Balandraud N, Darque A, Roudier C, Roudier J, Reviron D. Polymorphism at position -308 of the tumor necrosis factor alpha gene influences outcome of infliximab therapy in rheumatoid arthritis. *Arthritis Rheum*. 2003;48(7):1849-52.
33. Nishimoto T, Seta N, Anan R, Yamamoto T, Kaneko Y, Takeuchi T, et al. A single nucleotide polymorphism of TRAF1 predicts the clinical response to anti-TNF treatment in Japanese patients with rheumatoid arthritis. *Clin Exp Rheumatol*. 2014;32(2):211-7.
34. Padyukov L, Lampa J, Heimbürger M, Ernestam S, Cederholm T, Lundkvist I, et al. Genetic markers for the efficacy of tumour necrosis factor blocking therapy in rheumatoid arthritis. *Ann Rheum Dis*. 2003;62(6):526-9.
35. Pers YM, Cadart D, Rittore C, Ravel P, Daïen V, Fabre S, et al. TNFRII polymorphism is associated with response to TNF blockers in rheumatoid arthritis patients seronegative for ACPA. *Joint Bone Spine*. 2014;81(4):370-2.
36. Radstake TR, Franssen J, Toonen EJ, Coenen MJ, Eijsbouts AE, Donn R, et al. Macrophage migration inhibitory factor polymorphisms do not predict therapeutic response to glucocorticoids or to tumour necrosis factor alpha-neutralising treatments in rheumatoid arthritis. *Ann Rheum Dis*. 2007;66(11):1525-30.
37. Salgado E, Campos J, Moreira-Navarrete V, Mulero J, Navarro F, Pérez-Pampin E, et al. Rheumatoid factor does not predict response to TNF antagonists in rheumatoid arthritis: three centers experience. *Joint Bone Spine*. 2013;80(4):438-40.
38. Shi R, Chen M, Litifu B. Serum interleukin-6 and survivin levels predict clinical response to etanercept treatment in patients with established rheumatoid arthritis. *Mod Rheumatol*. 2018;28(1):126-32.
39. Skapenko A, Smolen JS, Kavanaugh A, Arora V, Kupper H, Schulze-Koops H. Genetic markers associated with clinical and radiographic response in adalimumab plus methotrexate- or methotrexate-treated rheumatoid arthritis patients in OPTIMA. *Clin Exp Rheumatol*. 2019;37(5):783-90.

40. Wampler Muskardin T, Vashisht P, Dorschner JM, Jensen MA, Chrobot BS, Kern M, et al. Increased pretreatment serum IFN- $\beta$ / $\alpha$  ratio predicts non-response to tumour necrosis factor  $\alpha$  inhibition in rheumatoid arthritis. *Ann Rheum Dis*. 2016;75(10):1757-62.
41. Zhao J, Ye X, Zhang Z. The predictive value of serum soluble ICAM-1 and CXCL13 in the therapeutic response to TNF inhibitor in rheumatoid arthritis patients who are refractory to csDMARDs. *Clin Rheumatol*. 2020;39(9):2573-81.
